# Supplementary material
Source: PubMed Central journal article supplement (PMC1087910)
Supplement: pnas_102_17_6125__1.pdf [file pnas_102_17_6125__1.pdf]

A

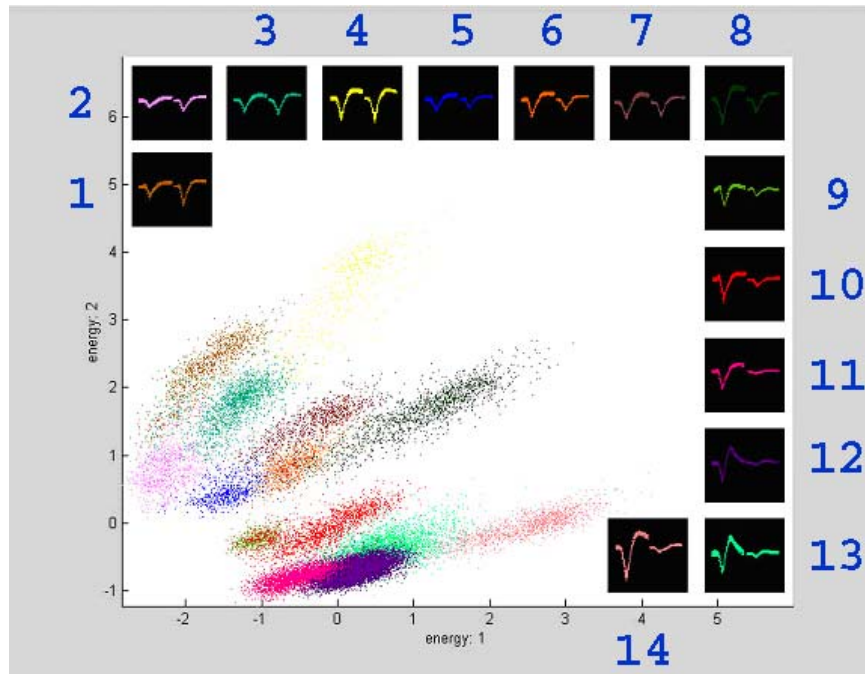

B

|          | L-Ratio | Isolation Distance (ID) |
|----------|---------|-------------------------|
| Clust 1  | 0.0764  | 25.9                    |
| Clust 2  | 0.0552  | 27                      |
| Clust 3  | 0.0518  | 26.9                    |
| Clust 4  | 0.0285  | 25                      |
| Clust 5  | 0.0563  | 23                      |
| Clust 6  | 0.0192  | 31                      |
| Clust 7  | 0.044   | 25.9                    |
| Clust 8  | 0.0141  | 33.1                    |
| Clust 9  | 0.0228  | 27.1                    |
| Clust 10 | 0.3007  | 15.7                    |
| Clust 11 | 0.0309  | 44.2                    |
| Clust 12 | 0.0526  | 24.62                   |
| Clust 13 | 1.9556  | 4.8                     |
| Clust 14 | 0.0449  | 37                      |
| Average  | 0.1966  | 26.51571                |
