# Supplementary material
Source: PubMed Central journal article supplement (PMC1087910)

A

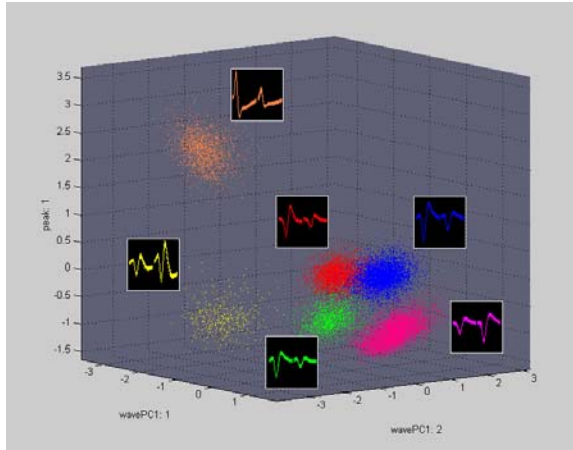

B

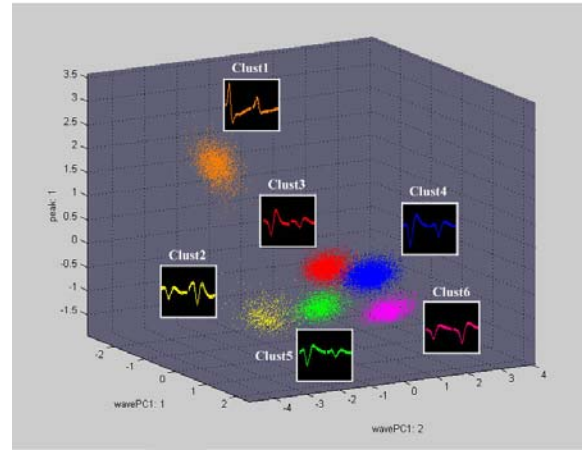

C

|         | L-Ratio | Isolation Distance (ID) |
|---------|---------|-------------------------|
| Clust 1 | 0.0045  | 184.4                   |
| Clust 2 | 0.0005  | 118.7                   |
| Clust 3 | 0.0036  | 85.3                    |
| Clust 4 | 0.0062  | 79.5                    |
| Clust 5 | 0.0049  | 54.6                    |
| Clust 6 | 0.0155  | 218.4                   |
| Average | 0.0058  | 123.4833                |

Supplement: pnas_102_17_6125__10.pdf [file pnas_102_17_6125__10.pdf]

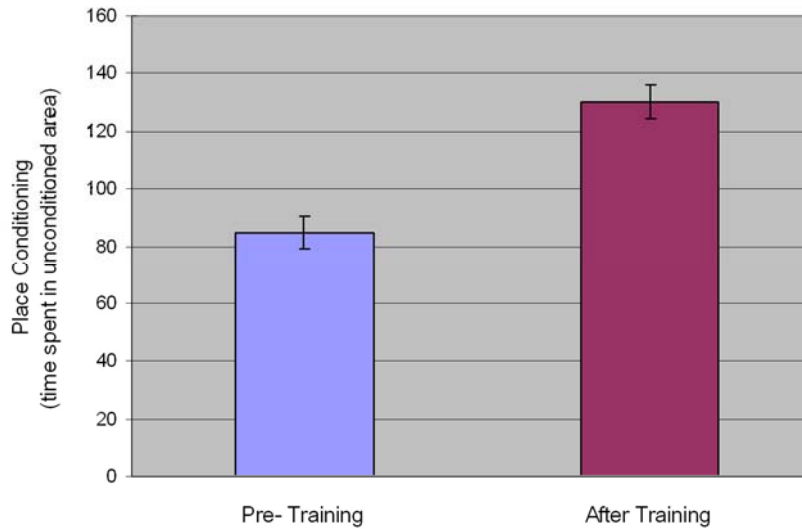

Supplement: pnas_102_17_6125__2.pdf [file pnas_102_17_6125__2.pdf]

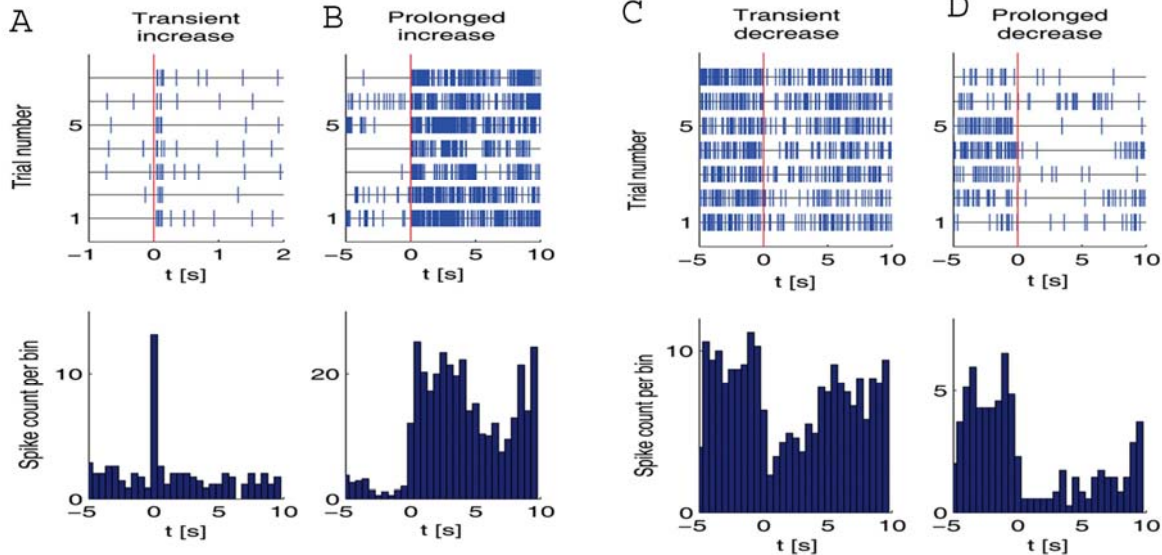

Supplement: pnas_102_17_6125__3.pdf [file pnas_102_17_6125__3.pdf]

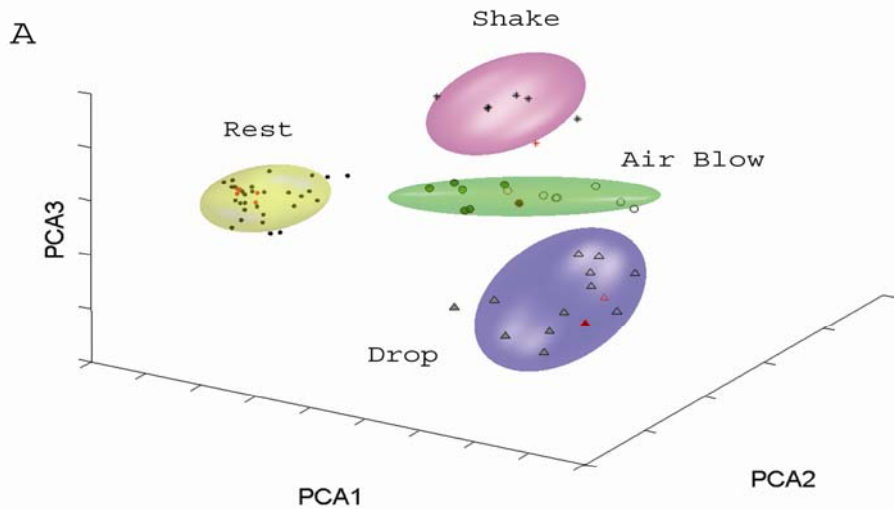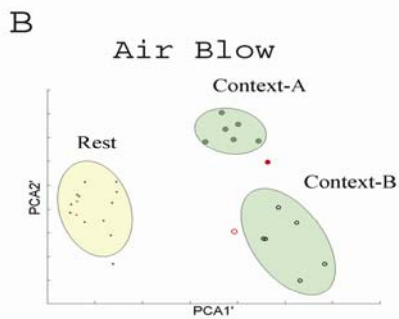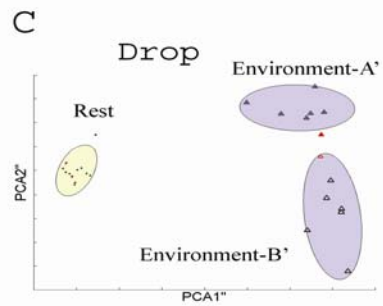

Supplement: pnas_102_17_6125__4.pdf [file pnas_102_17_6125__4.pdf]

A

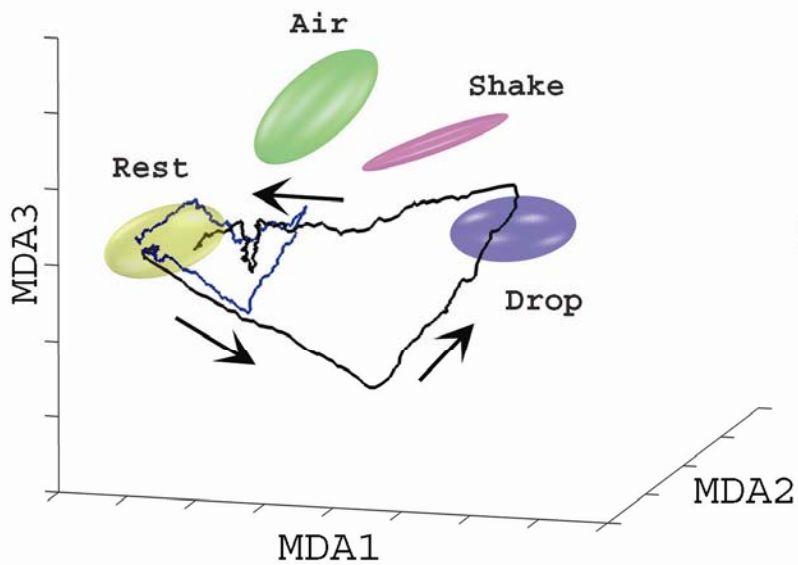

B

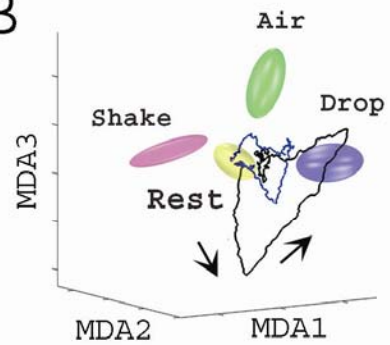

C

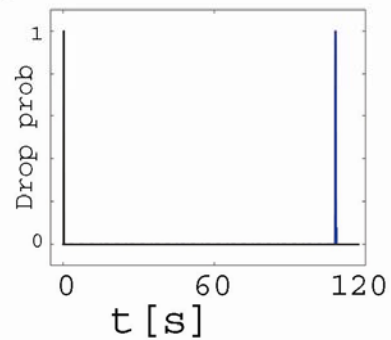

Supplement: pnas_102_17_6125__5.pdf [file pnas_102_17_6125__5.pdf]

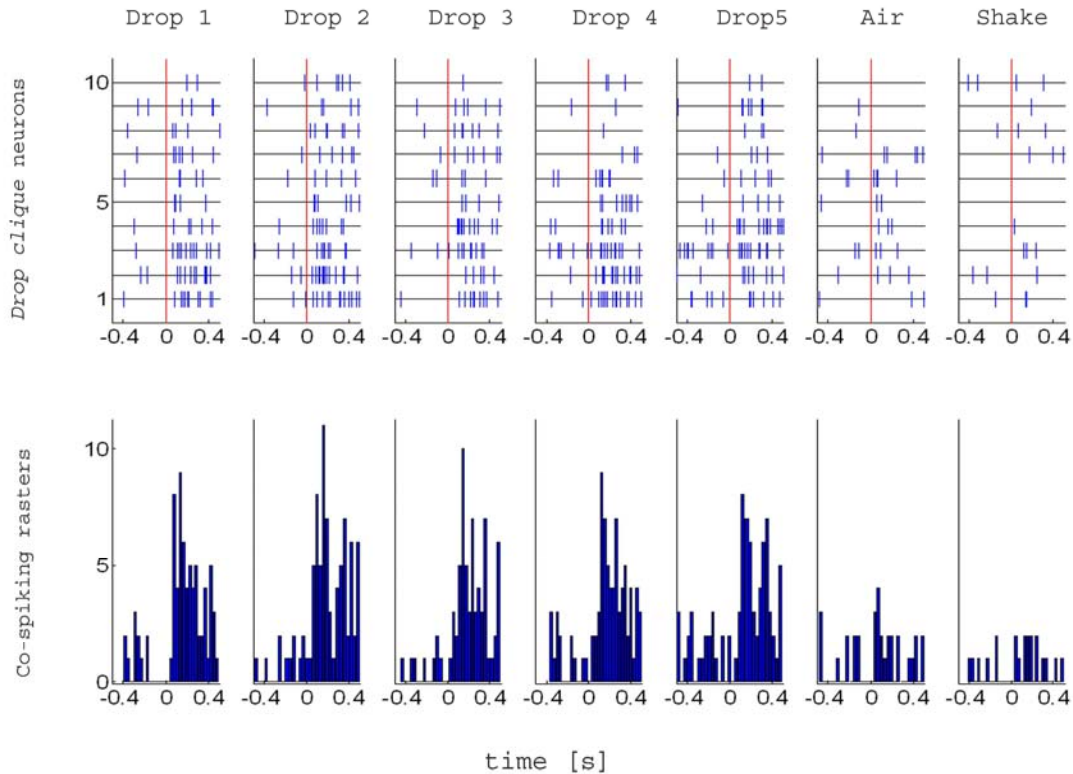

Supplement: pnas_102_17_6125__6.pdf [file pnas_102_17_6125__6.pdf]

A

Upstream  
cliqueDownstream  
clique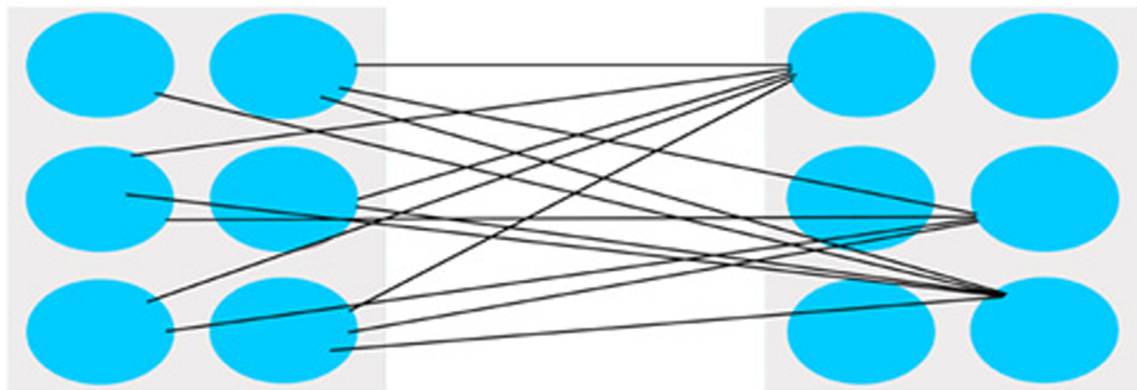

$$f(t) = h\left(\sum_{n=1}^N w_n R_n(t)\right)$$

B

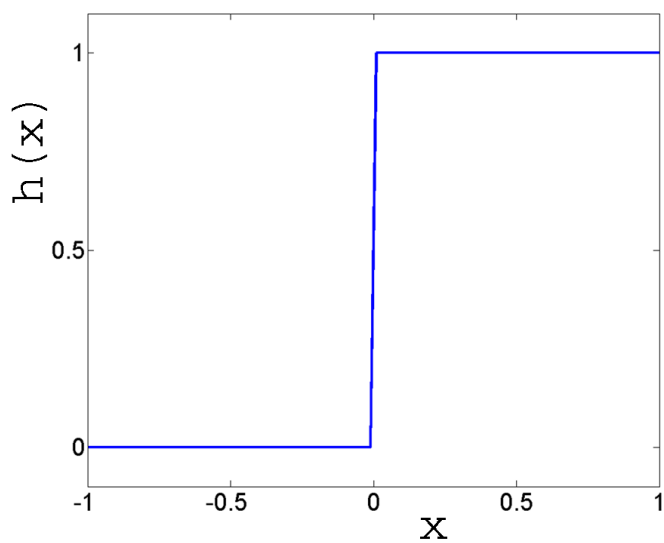

C

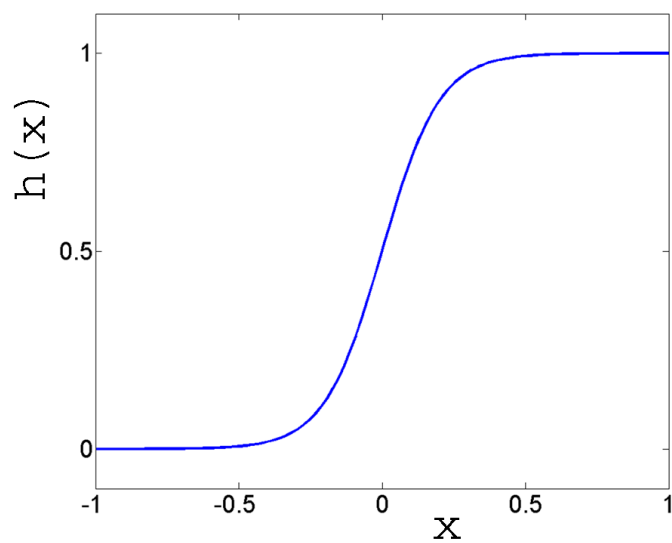

Supplement: pnas_102_17_6125__7.pdf [file pnas_102_17_6125__7.pdf]

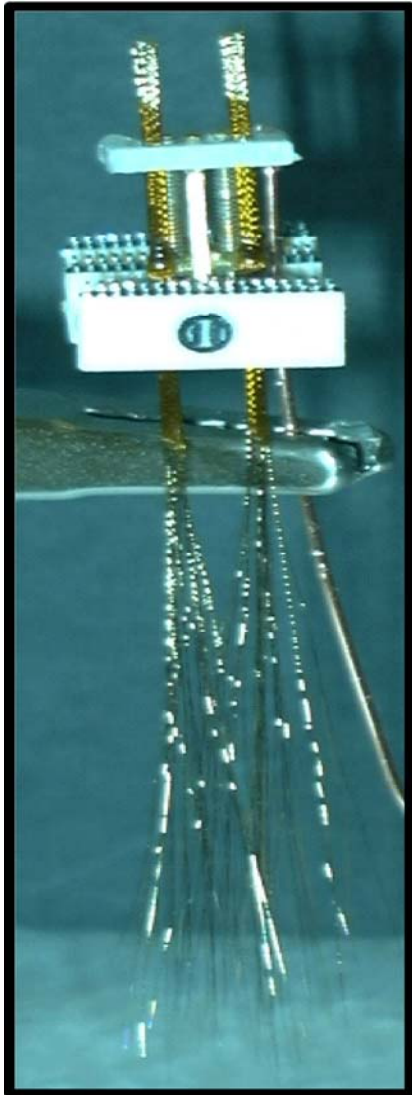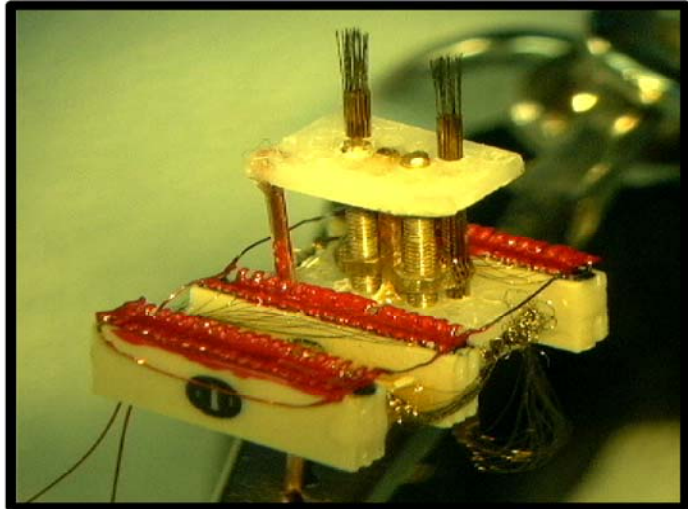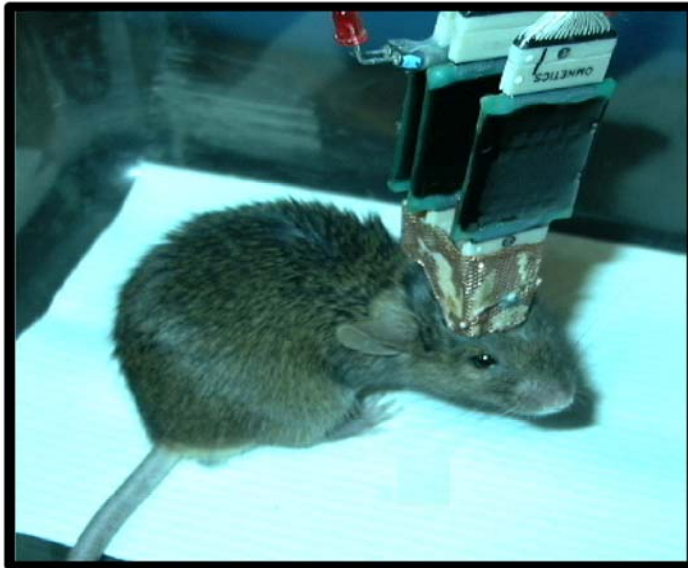

Supplement: pnas_102_17_6125__9.pdf [file pnas_102_17_6125__9.pdf]
